# Supplementary material for: Towards Marker-Assisted Breeding for Black Rot Bunch Resistance: Identification of a Major QTL in the Grapevine Cultivar ‘Merzling’
Source: MDPI journal article supplement (doi:10.3390/ijms24043568), 2023-02-10
Supplement: s1 [file s1]

Reference sequence (1): Vitvi14g02865  
Identities normalised by aligned length.  
Colored by: identity

|                  | cov    | pid    | 1                                                                                  |  | 80  |
|------------------|--------|--------|------------------------------------------------------------------------------------|--|-----|
| 1 Vitvi14g02865  | 100.0% | 100.0% | -----MKNMVINTLACIALAMSFFLASASDPSPLQDFCVAVNDTKTTVFVNGKVKCDLKVATANDLFFSRL            |  |     |
| 2 Vitvi14g01108  | 92.1%  | 75.6%  | -----MESILVKHRTPLP-PALPISLA-----FTPRTFGTIALLFVNGKVKCDPKVATANDFFFSGL                |  |     |
| 3 NA1            | 79.4%  | 72.4%  | -----MLQL-----FVNGKVKCDPKVATANDFFFSGL                                              |  |     |
| 4 Vitvi14g01106  | 80.7%  | 73.8%  | -----M-----LQC-----ERVVNGKVKCDPKVATANDFFFSGL                                       |  |     |
| 5 Vitvi14g01080  | 96.9%  | 84.6%  | MSMSSFRWAIALRCIRRGINTLACIALAMSFFLASASDPSPLQDFCVAVNDTKTTVFVNGKVKCDPKVATANDFFFSGL    |  |     |
| 6 Vitvi14g01075  | 96.9%  | 89.6%  | -----MKKMVNTLASIPLAMSFFLAFASDPSPLQDFCVAVNDTKTTVFVNGKVKCDPKVATPNDFFFSGL             |  |     |
| 7 Vitvi14g01113  | 96.9%  | 90.0%  | -----MKKMVNTLACIALAMSFFLASASDPSPLQDFCVAVNDTKTTVFVNGKVKCDPKVATADFFFSGL              |  |     |
| 8 Vitvi14g01082  | 96.9%  | 90.5%  | -----MKKMVNTLACIALAMSFFLASASDPSPLQDFCVAVNDTKTTVFVNGKVKCDPKVATANDFFFSGL             |  |     |
| 9 Vitvi14g04720  | 96.9%  | 92.3%  | -----MKKMVINTLACIALAMSFFLASASDPSPLQDFCVAVNDTKTTVFVNGKVKCDPKVATANDFFFSGL            |  |     |
| 10 Vitvi14g01096 | 96.9%  | 91.9%  | -----MKKMVINTLACIALAMSFFLASASDPSPLQDFCVAVNDTKTTVFVNGKVKCDPKVATANDFFFSGL            |  |     |
| 11 NA2           | 96.9%  | 91.9%  | -----MKKMVINTLACIALAMSFFLASASDPSPLQDFCVAVNDTKTTVFVNGKVKCDPKVATANDFFFSGL            |  |     |
| 12 Vitvi14g04724 | 96.9%  | 91.9%  | -----MKKMVINTLACIALAMSFFLASASDPSPLQDFCVAVNDTKTTVFVNGKVKCDPKVATANDFFFSGL            |  |     |
| 13 Vitvi14g01112 | 96.9%  | 91.9%  | -----MKKMVINTLACIALAMSFFLASASDPSPLQDFCVAVNDTKTTVFVNGKVKCDPKVATANDFFFSGL            |  |     |
| 14 Vitvi14g02863 | 96.9%  | 91.4%  | -----MKKMVINTLACIALAMSFFLASASDPSPLQDFCVAVNDTKTTVFVNGKVKCDPKVATANDFFFSGL            |  |     |
| 15 Vitvi14g02864 | 96.9%  | 91.4%  | -----MKKMVINTLACIALAMSFFLASASDPSPLQDFCVAVNDTKTTVFVNGKVKCDPKVATANDFFFSGL            |  |     |
| consensus/100%   |        |        | .....h.....FVNGKVKCD..KVATssDhFFStL                                                |  |     |
| consensus/90%    |        |        | .....M.ph.....hts.....thlFVNGKVKCDPKVATANDFFFSGL                                   |  |     |
| consensus/80%    |        |        | .....McpHl1nLACIsL..AMSFFLA..sSDPSPLQ-FCAVNDTKTTVFVNGKVKCDPKVATANDFFFSGL           |  |     |
| consensus/70%    |        |        | .....MK+MV1nLACIAL..AMSFFLASASDPSPLQDFCVAVNDTKTTVFVNGKVKCDPKVATANDFFFSGL           |  |     |
|                  | cov    | pid    | 81                                                                                 |  | 160 |
| 1 Vitvi14g02865  | 100.0% | 100.0% | QVLGHTSNKLESMTQANVAQIPDLNLTGISLARVDYAPYGLNPPHTYPRATEILTVLEGLTVYGVFTSNPDNRLISKVL    |  |     |
| 2 Vitvi14g01108  | 92.1%  | 75.6%  | RVPGNTSNKLGSMVTPANVAQIPDLKTLGISLARVDYAPYGLNPPHTHPRATEILTVLEGLTVYGVFTSNPDNRLISKVL   |  |     |
| 3 NA1            | 79.4%  | 72.4%  | RVPGNTSNKLGSMVTPANVAQIPDLKTLGISLARVDYAPYGLNPPHTHPRATEILTVLEGLTVYGVFTSNPDNRLISKVL   |  |     |
| 4 Vitvi14g01106  | 80.7%  | 73.8%  | RVPGNTSNKLGSMVTPANVAQIPDLKTLGISLARVDYAPYGLNPPHTHPRATEILTVLEGLTVYGVFTSNPDNRLISKVL   |  |     |
| 5 Vitvi14g01080  | 96.9%  | 84.6%  | RVPGNTSNKLGSMVTPANVAQIPGLNTLGISLARVDYAPYGLNPPHTHPRATEILTVLEGLTVYGVFTSNPDNRLIAKVL   |  |     |
| 6 Vitvi14g01075  | 96.9%  | 89.6%  | RVPGNTSNKVGSMVTPANVAQIPGLNTLGISLARVDYAPYGLNPPHTHPRATEILTVLEGLTVYGVFTSNPDNRLISKVL   |  |     |
| 7 Vitvi14g01113  | 96.9%  | 90.0%  | RVPGNTSNKVGSMVTPANVAQIPGLNTLGISLARVDYAPYGLNPPHTHPRATEILTVLEGLTVYGVFTSNPDNRLICKVL   |  |     |
| 8 Vitvi14g01082  | 96.9%  | 90.5%  | RVPGNTSNKVGSMVTPANVAQIPGLNTLGISLARVDYAPYGLNPPHTHPRATEILTVLEGLTVYGVFTSNPDNRLICKVL   |  |     |
| 9 Vitvi14g04720  | 96.9%  | 92.3%  | RVPGNTSNKLGSMVTPANVAQIPGLNTLGISLARVDYAPYGLNPPHTHPRATEILTVLEGLTVYGVFTSNPDNRLISKVL   |  |     |
| 10 Vitvi14g01096 | 96.9%  | 91.9%  | RVPGNTSNKLGSMVTPANVAQIPGLNTLGISLARVDYAPYGLNPPHTHPRATEILTVLEGLTVYGVFTSNPDNRLISKVL   |  |     |
| 11 NA2           | 96.9%  | 91.9%  | RVPGNTSNKVGSMVTPANVAQIPGLNTLGISLARVDYAPYGLNPPHTHPRATEILTVLEGLTVYGVFTSNPDNRLISKVL   |  |     |
| 12 Vitvi14g04724 | 96.9%  | 91.9%  | RVPGNTSNKVGSMVTPANVAQIPGLNTLGISLARVDYAPYGLNPPHTHPRATEILTVLEGLTVYGVFTSNPDNRLISKVL   |  |     |
| 13 Vitvi14g01112 | 96.9%  | 91.9%  | RVPGNTSNKVGSMVTPANVAQIPGLNTLGISLARVDYAPYGLNPPHTHPRATEILTVLEGLTVYGVFTSNPDNRLISKVL   |  |     |
| 14 Vitvi14g02863 | 96.9%  | 91.4%  | RVPGNTSNKVGSMVTPANVAQIPGLNTLGISLARVDYAPYGLNPPHTHPRATEILTVLEGLTVYGVFTSNPDNRLISKVL   |  |     |
| 15 Vitvi14g02864 | 96.9%  | 91.4%  | RVPGNTSNKVGSMVTPANVAQIPGLNTLGISLARVDYAPYGLNPPHTHPRATEILTVLEGLTVYGVFTSNPDNRLISKVL   |  |     |
| consensus/100%   |        |        | pV.GpTSNK1tsMVT..ANVAQIPtLpTLGISLARVDYAPYGLNPPHTaPRStEILThLEGLTVYGVFTSNPDNRLIsKVL  |  |     |
| consensus/90%    |        |        | RVPGNTSNK1GSMVTPANVAQIPsLpTLGISLARVDYAPYGLNPPHTHPRStEILThLEGLTVYGVFTSNPDNRLIsKVL   |  |     |
| consensus/80%    |        |        | RVPGNTSNK1GSMVTPANVAQIPsLNTLGISLARVDYAPYGLNPPHTHPRATEILTVLEGLTVYGVFTSNPDNRLISKVL   |  |     |
| consensus/70%    |        |        | RVPGNTSNK1GSMVTPANVAQIPGLNTLGISLARVDYAPYGLNPPHTHPRATEILTVLEGLTVYGVFTSNPDNRLISKVL   |  |     |
|                  | cov    | pid    | 161                                                                                |  | 240 |
| 1 Vitvi14g02865  | 100.0% | 100.0% | YKGDVFIFLEGLIHQFLNVGKTKAIAIAALSSQNPGVITIANAVFGSKPAISADVLTKAFQVDKKVVDYLSQSFWDNHT    |  |     |
| 2 Vitvi14g01108  | 92.1%  | 75.6%  | YKGDVFVFPEDLIHQFLNVEKTKAIAIAALSSQNPGVITIANAVFGSKPAISADVLTKAFQVDKKVVDYLSQSF-----    |  |     |
| 3 NA1            | 79.4%  | 72.4%  | YKGDVFVFPEDLIHQFLNVEKTKAIAIAALSSQNPGVITIANAVFGSKPAISADVLTKAFQVDKKVVDYLSQSF-----    |  |     |
| 4 Vitvi14g01106  | 80.7%  | 73.8%  | YKGDVFVFPEDLIHQFLNVEKTKAIAIAALSSQNPGVITIANAVFGSKPAISADVLTKAFQVDKKVVDYLSQSF-----    |  |     |
| 5 Vitvi14g01080  | 96.9%  | 84.6%  | YKGDVFVFPEGLIHQFLNVGKTKAIAIAALSSQNPGVITIANAVFGSKPAISADVLTKAFQVDKKVVDYLSQSF-----    |  |     |
| 6 Vitvi14g01075  | 96.9%  | 89.6%  | YKGDVFVFPEGLIHQFLNVGKTKAIAIAALSSQNPGVITIANAVFGSKPAISADVLTKAFQVDKKVVDYLSQSF-----    |  |     |
| 7 Vitvi14g01113  | 96.9%  | 90.0%  | YKGDVFIFPEGLIHQFLNVGKTKAIAIAALSSQNPGVITIANAVFGSKPAISADVLTKAFQVDKNVVDYLSQSF-----    |  |     |
| 8 Vitvi14g01082  | 96.9%  | 90.5%  | YKGDVFVFPEGLIHQFLNVGKTKAIAIAALSSQNPGVITIANAVFGSKPAISADVLTKAFQVDKKVVDYLSQSF-----    |  |     |
| 9 Vitvi14g04720  | 96.9%  | 92.3%  | YKGDVFVFPEGLIHQFLNVGKTKAIAIAALSSQNPGVITIANAVFGSKPAISADVLTKAFQVDKKVVDYLSQSF-----    |  |     |
| 10 Vitvi14g01096 | 96.9%  | 91.9%  | YKGDVFVFPEGLIHQFLNVGKTKAIAIAALSSQNPGVITIANAVFGSKPAISADVLTKAFQVDKKVVDYLSQSF-----    |  |     |
| 11 NA2           | 96.9%  | 91.9%  | YKGDVFVFPEGLIHQFLNVGKTKAIAIAALSSQNPGVITIANAVFGSKPAISADVLTKAFQVDKKVVDYLSQSF-----    |  |     |
| 12 Vitvi14g04724 | 96.9%  | 91.9%  | YKGDVFVFPEGLIHQFLNVGKTKAIAIAALSSQNPGVITIANAVFGSKPAISADVLTKAFQVDKKVVDYLSQSF-----    |  |     |
| 13 Vitvi14g01112 | 96.9%  | 91.9%  | YKGDVFVFPEGLIHQFLNVGKTKAIAIAALSSQNPGVITIANAVFGSKPAISADVLTKAFQVDKKVVDYLSQSF-----    |  |     |
| 14 Vitvi14g02863 | 96.9%  | 91.4%  | YKGDVFVFPEGLIHQFLNVGKTKAIAIAALSSQNPGVITIANAVFGSKPAISADVLTKAFQVDKKVVDYLSQSF-----    |  |     |
| 15 Vitvi14g02864 | 96.9%  | 91.4%  | YKGDVFVFPEGLIHQFLNVGKTKAIAIAALSSQNPGVITIANAVFGSKPAISADVLTKAFQVDKKVVDYLSQSF-----    |  |     |
| consensus/100%   |        |        | YKGDVF1F..EsLIHFpLNVtKTKAIAIAALSSQN..GVITIANAVFGSKPAISADVLTKAFQVDKpVVVDYLSQSF..... |  |     |
| consensus/90%    |        |        | YKGDVF1FpEsLIHFQFLNVtKTKAIAIAALSSQNPGVITIANAVFGSKPAISADVLTKAFQVDKKVVDYLSQSF.....   |  |     |
| consensus/80%    |        |        | YKGDVFVFPEGLIHQFLNVtKTKAIAIAALSSQNPGVITIANAVFGSKPAISADVLTKAFQVDKKVVDYLSQSF.....    |  |     |
| consensus/70%    |        |        | YKGDVFVFPEGLIHQFLNVGKTKAIAIAALSSQNPGVITIANAVFGSKPAISADVLTKAFQVDKKVVDYLSQSF.....    |  |     |
|                  | cov    | pid    | 241                                                                                |  | 241 |
| 1 Vitvi14g02865  | 100.0% | 100.0% | N                                                                                  |  |     |
| 2 Vitvi14g01108  | 92.1%  | 75.6%  | -                                                                                  |  |     |
| 3 NA1            | 79.4%  | 72.4%  | -                                                                                  |  |     |
| 4 Vitvi14g01106  | 80.7%  | 73.8%  | -                                                                                  |  |     |
| 5 Vitvi14g01080  | 96.9%  | 84.6%  | -                                                                                  |  |     |
| 6 Vitvi14g01075  | 96.9%  | 89.6%  | -                                                                                  |  |     |
| 7 Vitvi14g01113  | 96.9%  | 90.0%  | -                                                                                  |  |     |
| 8 Vitvi14g01082  | 96.9%  | 90.5%  | -                                                                                  |  |     |
| 9 Vitvi14g04720  | 96.9%  | 92.3%  | -                                                                                  |  |     |
| 10 Vitvi14g01096 | 96.9%  | 91.9%  | -                                                                                  |  |     |
| 11 NA2           | 96.9%  | 91.9%  | -                                                                                  |  |     |
| 12 Vitvi14g04724 | 96.9%  | 91.9%  | -                                                                                  |  |     |
| 13 Vitvi14g01112 | 96.9%  | 91.9%  | -                                                                                  |  |     |
| 14 Vitvi14g02863 | 96.9%  | 91.4%  | -                                                                                  |  |     |

|    |                |       |       |   |
|----|----------------|-------|-------|---|
| 15 | Vitvi14g02864  | 96.9% | 91.4% | - |
|    | consensus/100% |       |       | . |
|    | consensus/90%  |       |       | . |
|    | consensus/80%  |       |       | . |
|    | consensus/70%  |       |       | . |

[MView](#) 1.63, Copyright © 1997-2018 [Nigel P. Brown](#)

## Consensus pattern definitions

Consensus patterns are based on equivalence classes, that is, sets of residues that share some predefined property. These classes are not mutually exclusive and the consensus mechanism will choose the most specific class that summarizes a given column at the desired percent identity.

The default for protein alignments is called P1 and is defined by physicochemical property as follows:

```
[P1]
#Protein consensus: conserved physicochemical classes, derived from
#the Venn diagrams of: Taylor W. R. (1986). The classification of amino
acid
#conservation. J. Theor. Biol. 119:205-218.
#description => symbol members
*
=> .
A
=> A { A }
C
=> C { C }
D
=> D { D }
E
=> E { E }
F
=> F { F }
G
=> G { G }
H
=> H { H }
I
=> I { I }
K
=> K { K }
L
=> L { L }
M
=> M { M }
N
=> N { N }
P
=> P { P }
Q
=> Q { Q }
R
=> R { R }
S
=> S { S }
T
=> T { T }
V
=> V { V }
W
=> W { W }
Y
=> Y { Y }
alcohol
=> o { S, T }
aliphatic
=> l { I, L, V }
aromatic
=> a { F, H, W, Y }
charged
=> c { D, E, H, K, R }
hydrophobic
=> h { A, C, F, G, H, I, K, L, M, R, T, V, W, Y }
negative
=> - { D, E }
polar
=> p { C, D, E, H, K, N, Q, R, S, T }
positive
=> + { H, K, R }
small
=> s { A, C, D, G, N, P, S, T, V }
tiny
=> u { A, G, S }
turnlike
=> t { A, C, D, E, G, H, K, N, Q, R, S, T }
```

Percent Identity Matrix - created by Clustal2.1

|                  | 1     | 2     | 3     | 4     | 5     | 6     | 7     | 8     | 9     | 10    | 11    | 12    | 13    | 14  | Protein lenght |
|------------------|-------|-------|-------|-------|-------|-------|-------|-------|-------|-------|-------|-------|-------|-----|----------------|
| 1 Vitvi14g02865  |       |       |       |       |       |       |       |       |       |       |       |       |       |     | 228            |
| 2 Vitvi14g01108  | 79.52 |       |       |       |       |       |       |       |       |       |       |       |       |     | 210            |
| 3 NA1            | 88.4  | 97.24 |       |       |       |       |       |       |       |       |       |       |       |     | 181            |
| 4 Vitvi14g01106  | 88.59 | 95.65 | 100   |       |       |       |       |       |       |       |       |       |       |     | 184            |
| 5 Vitvi14g01080  | 89.59 | 83.81 | 93.37 | 93.48 |       |       |       |       |       |       |       |       |       |     | 234            |
| 6 Vitvi14g01075  | 89.59 | 85.24 | 93.92 | 93.48 | 94.12 |       |       |       |       |       |       |       |       |     | 221            |
| 7 Vitvi14g01113  | 90.05 | 83.33 | 92.27 | 92.39 | 94.12 | 95.93 |       |       |       |       |       |       |       |     | 221            |
| 8 Vitvi14g01082  | 90.5  | 84.76 | 93.92 | 94.02 | 95.48 | 97.29 | 98.64 |       |       |       |       |       |       |     | 221            |
| 9 Vitvi14g04720  | 92.31 | 85.24 | 95.03 | 95.11 | 96.83 | 97.29 | 96.83 | 98.19 |       |       |       |       |       |     | 221            |
| 10 Vitvi14g01096 | 91.86 | 85.24 | 95.03 | 95.11 | 96.38 | 96.83 | 97.29 | 98.64 | 99.55 |       |       |       |       |     | 221            |
| 11 NA2           | 91.86 | 84.76 | 94.48 | 94.57 | 96.38 | 97.74 | 97.29 | 98.64 | 99.55 | 99.1  |       |       |       |     | 221            |
| 12 Vitvi14g04724 | 91.86 | 84.76 | 94.48 | 94.57 | 96.38 | 97.74 | 97.29 | 98.64 | 99.55 | 99.1  | 100   |       |       |     | 221            |
| 13 Vitvi14g01112 | 91.86 | 84.76 | 94.48 | 94.57 | 96.38 | 97.74 | 97.29 | 98.64 | 99.55 | 99.1  | 100   | 100   |       |     | 221            |
| 14 Vitvi14g02863 | 91.4  | 84.76 | 94.48 | 94.57 | 95.93 | 97.29 | 97.74 | 99.1  | 99.1  | 99.55 | 99.55 | 99.55 | 99.55 |     | 221            |
| 15 Vitvi14g02864 | 91.4  | 84.76 | 94.48 | 94.57 | 95.93 | 97.29 | 97.74 | 99.1  | 99.1  | 99.55 | 99.55 | 99.55 | 99.55 | 100 | 221            |
