# Supplementary figures and images for: Towards Marker-Assisted Breeding for Black Rot Bunch Resistance: Identification of a Major QTL in the Grapevine Cultivar ‘Merzling’
Source: MDPI journal article supplement (doi:10.3390/ijms24043568), 2023-02-10

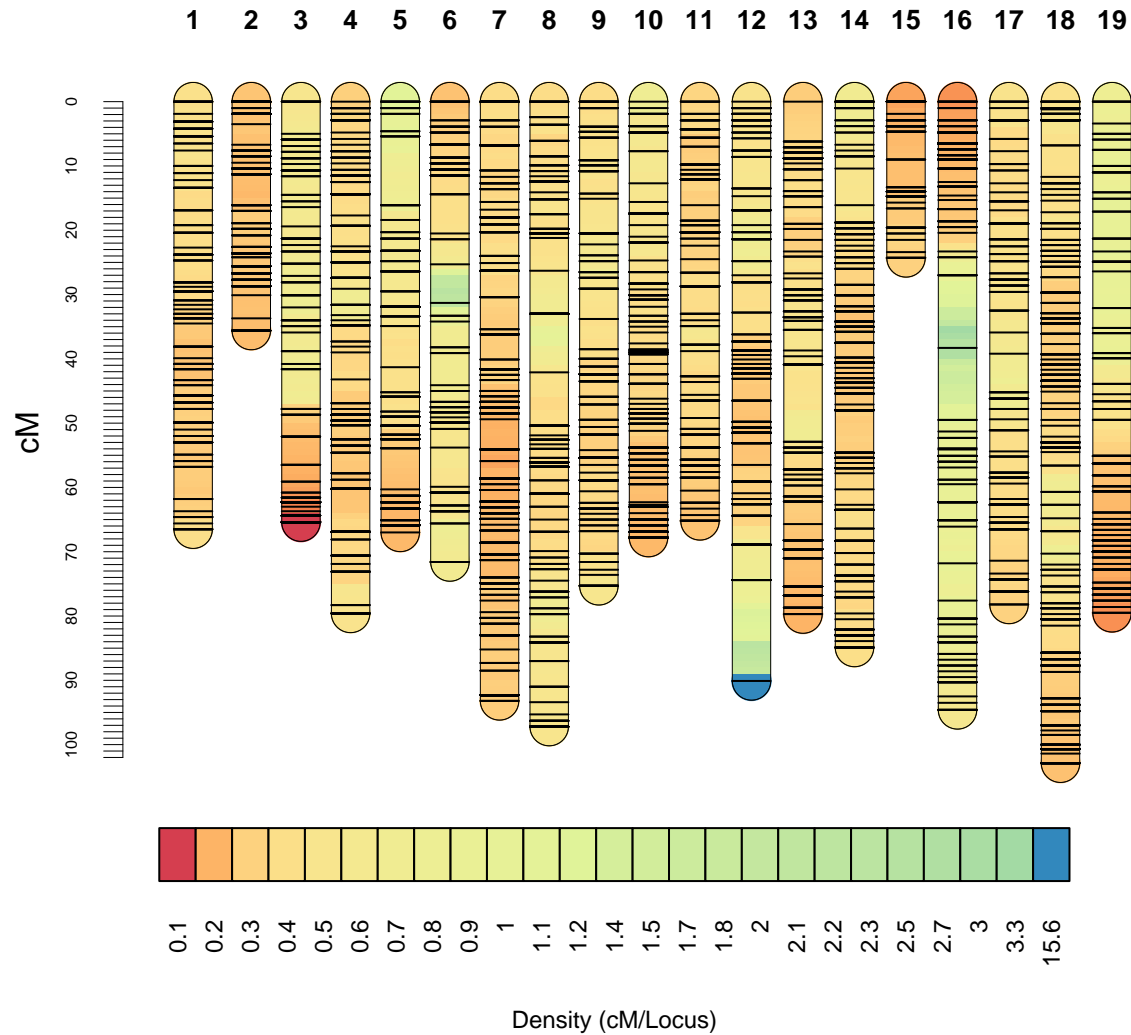

Supplement: s1 [file s1]

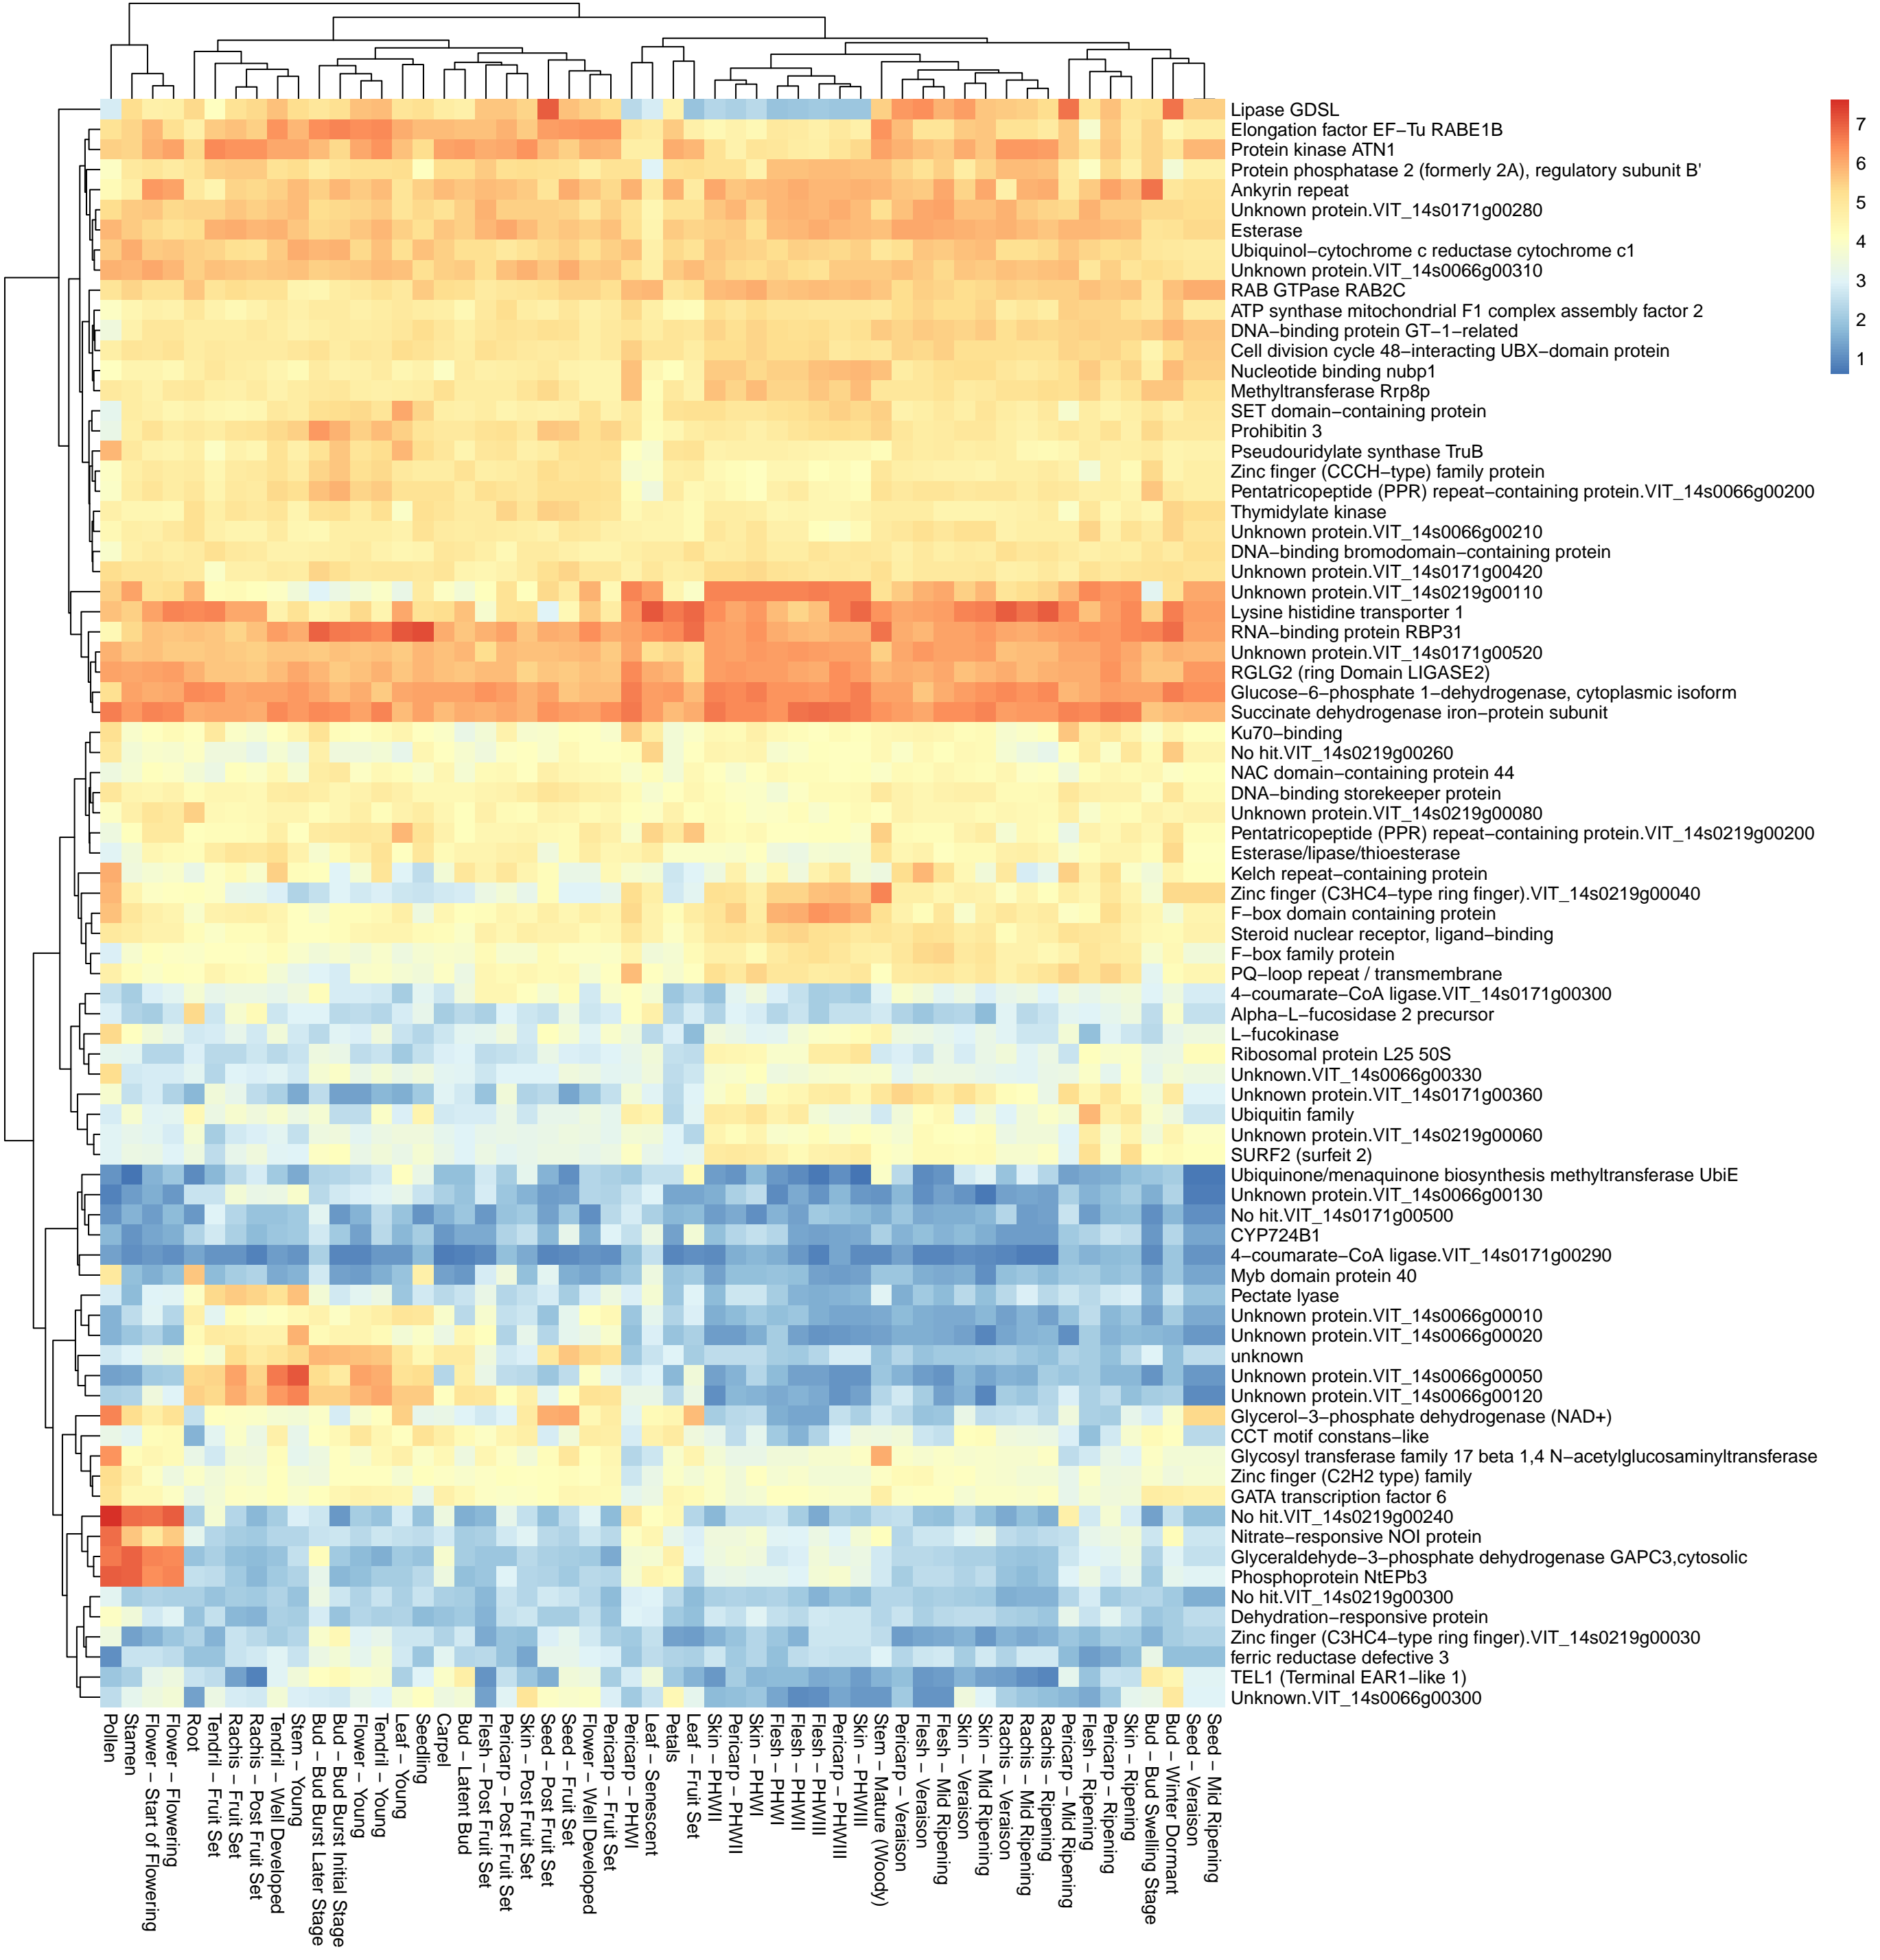

Supplement: s1 [file s1]

1 2 3 4 5 6 7 8 9 10 11 12 13 14 15 16 17 18 19

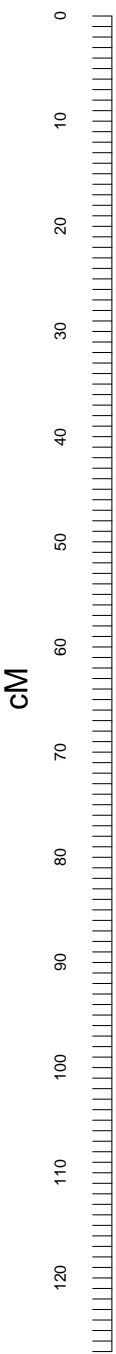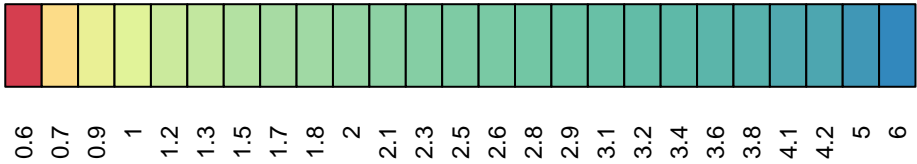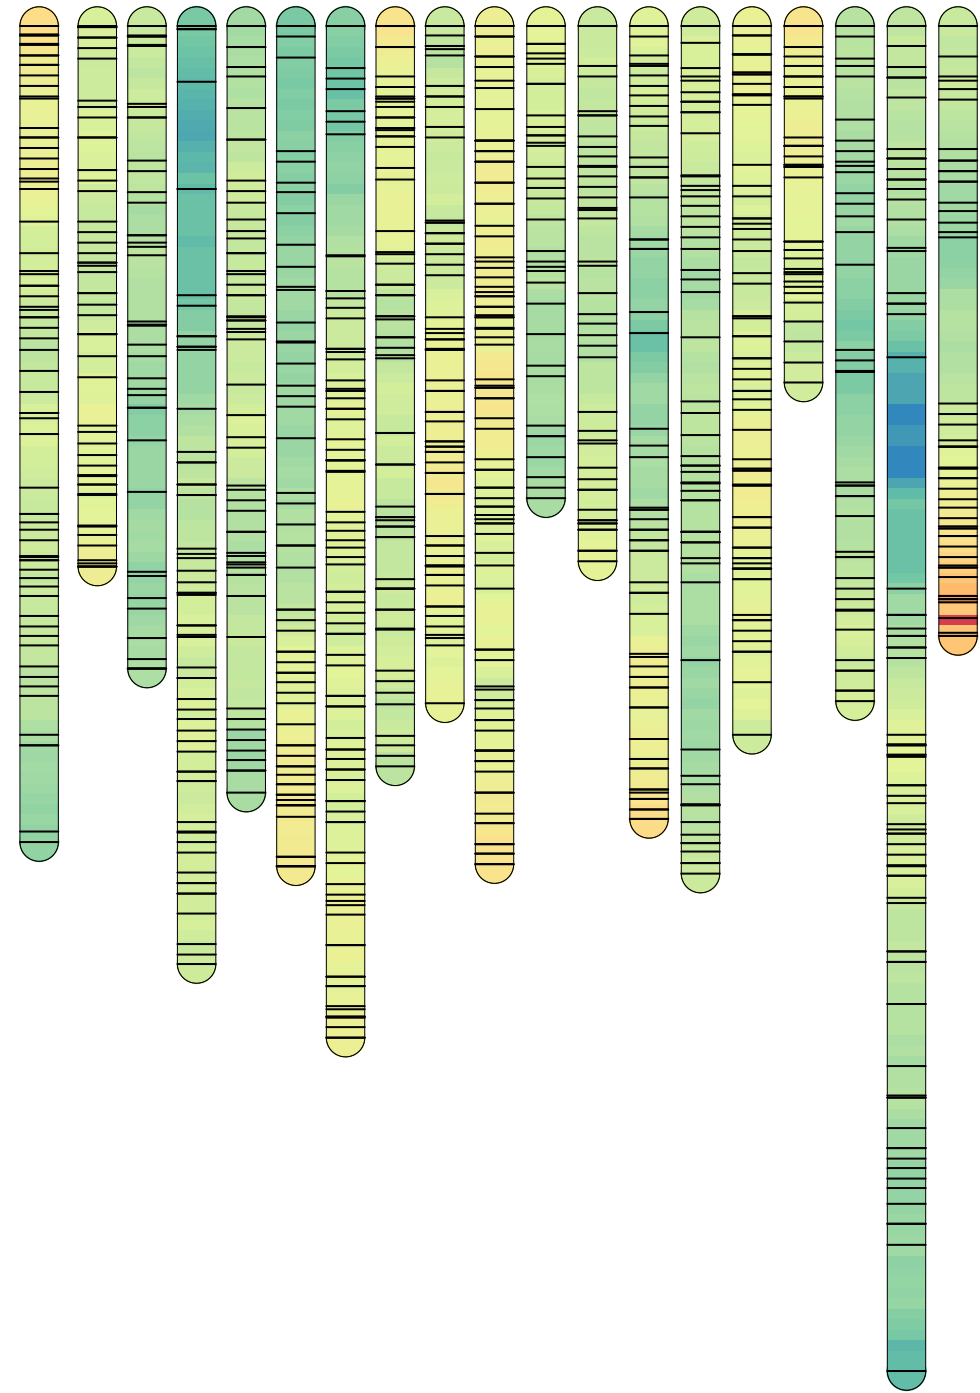

Supplement: s1 [file s1]
